# Supplementary material for: Dominating Clasp of the Financial Sector Revealed by Partial Correlation Analysis of the Stock Market
Source: PubMed Central journal article supplement (PMC3004792; doi:10.1371/journal.pone.0015032), 2010-12-20
Supplement: pone.0015032.s001.pdf [file pone.0015032.s001.pdf]

| <b>index</b> | <b>tick</b> | <b>sector</b>         | <b>subsector</b>              |
|--------------|-------------|-----------------------|-------------------------------|
| 1            | GE          | Conglomerates         | Conglomerates                 |
| 2            | PFE         | Healthcare            | Major Drugs                   |
| 3            | WMT         | Services              | Retail Department & Discount  |
| 4            | AIG         | Financial             | Insurance Prop. & Casualty    |
| 5            | IBM         | Technology            | Computer Hardware             |
| 6            | KO          | Consumer_Non_Cyclical | Beverages Non-Alcoholic       |
| 7            | JNJ         | Healthcare            | Major Drugs                   |
| 8            | PG          | Consumer_Non_Cyclical | Personal & Household Products |
| 9            | MRK         | Healthcare            | Major Drugs                   |
| 10           | BAC         | Financial             | Money Center Banks            |
| 11           | WFC         | Financial             | Money Center Banks            |
| 12           | SBC         | Services              | Communication Services        |
| 13           | FNM         | Financial             | Consumer Financial Services   |
| 14           | HD          | Services              | Retail Home Improvement       |
| 15           | PEP         | Consumer_Non_Cyclical | Beverages Non-Alcoholic       |
| 16           | LLY         | Healthcare            | Major Drugs                   |
| 17           | BUD         | Consumer_Non_Cyclical | Beverages Alcoholic           |
| 18           | ABT         | Healthcare            | Major Drugs                   |
| 19           | BMJ         | Healthcare            | Major Drugs                   |
| 20           | AXP         | Financial             | Consumer Financial Services   |
| 21           | MER         | Financial             | Investment Services           |
| 22           | MDT         | Healthcare            | Medical Equipment & Supplies  |
| 23           | UTX         | Conglomerates         | Conglomerates                 |
| 24           | BLS         | Services              | Communication Services        |
| 25           | ONE         | Financial             | Regional Banks                |
| 26           | TYC         | Conglomerates         | Conglomerates                 |
| 27           | TXN         | Technology            | Semiconductors                |
| 28           | G           | Consumer_Non_Cyclical | Personal & Household Products |
| 29           | DD          | Basic_Materials       | Chemical - Plastic & Rubber   |
| 30           | DIS         | Services              | Broadcasting & Cable TV       |
| 31           | LOW         | Services              | Retail Home Improvement       |
| 32           | BA          | Capital_Good          | Aerospace & Defense           |
| 33           | FRE         | Financial             | Consumer Financial Services   |
| 34           | MCD         | Services              | Restaurants                   |
| 35           | DOW         | Basic_Materials       | Chemical - Plastic & Rubber   |
| 36           | GM          | Consumer_Cyclical     | Auto & Truck Manufacturers    |
| 37           | ALL         | Financial             | Insurance Prop. & Casualty    |
| 38           | WAG         | Services              | Retail Drugs                  |
| 39           | FDC         | Technology            | Computer Services             |
| 40           | CL          | Consumer_Non_Cyclical | Personal & Household Products |
| 41           | SLB         | Energy                | Oil Well Services & Equipment |
| 42           | SGP         | Healthcare            | Major Drugs                   |
| 43           | BK          | Financial             | Money Center Banks            |
| 44           | CAT         | Capital_Good          | Constr. & Agric. Machinery    |
| 45           | KMB         | Basic_Materials       | Paper & Paper Products        |
| 46           | MOT         | Technology            | Communication Equipment       |
| 47           | KRB         | Financial             | Regional Banks                |
| 48           | EMR         | Conglomerates         | Conglomerates                 |
| 49           | BSX         | Healthcare            | Medical Equipment & Supplies  |
| 50           | EMC         | Technology            | Computer Storage Devices      |
| 51           | GCI         | Services              | Printing & Publishing         |
| 52           | CCU         | Services              | Broadcasting & Cable TV       |

|     |     |                       |                               |
|-----|-----|-----------------------|-------------------------------|
| 53  | CAH | Healthcare            | Biotechnology & Drugs         |
| 54  | SYG | Services              | Retail Grocery                |
| 55  | TRB | Services              | Printing & Publishing         |
| 56  | MMC | Financial             | Insurance Miscellaneous       |
| 57  | RD  | Energy                | Oil & Gas - Integrated        |
| 58  | ITW | Capital_Good          | Misc. Capital Goods           |
| 59  | IGT | Services              | Casinos & Gaming              |
| 60  | AVP | Consumer_Non_Cyclical | Personal & Household Products |
| 61  | AFL | Financial             | Insurance Accidental & Health |
| 62  | GIS | Consumer_Non_Cyclical | Food Processing               |
| 63  | GPS | Services              | Retail Apparel                |
| 64  | NCC | Financial             | Regional Banks                |
| 65  | SO  | Utilities             | Electric Utilities            |
| 66  | GD  | Capital_Good          | Aerospace & Defense           |
| 67  | STI | Financial             | Regional Banks                |
| 68  | IP  | Basic_Materials       | Paper & Paper Products        |
| 69  | LEH | Financial             | Investment Services           |
| 70  | BAX | Healthcare            | Medical Equipment & Supplies  |
| 71  | S   | Services              | Services                      |
| 72  | PNC | Financial             | Regional Banks                |
| 73  | PGR | Financial             | Insurance Prop. & Casualty    |
| 74  | UNP | Transportation        | Railroad                      |
| 75  | MEL | Financial             | Investment Services           |
| 76  | GDT | Healthcare            | Medical Equipment & Supplies  |
| 77  | PPG | Basic_Materials       | Chemical Manufacturing        |
| 78  | DUK | Utilities             | Electric Utilities            |
| 79  | NEM | Basic_Materials       | Gold & Silver                 |
| 80  | NOC | Capital_Good          | Aerospace & Defense           |
| 81  | DE  | Capital_Good          | Constr. & Agric. Machinery    |
| 82  | OMC | Services              | Advertising                   |
| 83  | CA  | Technology            | Software & Programming        |
| 84  | SLE | Consumer_Non_Cyclical | Food Processing               |
| 85  | ADI | Technology            | Semiconductors                |
| 86  | BBY | Services              | Retail Technology             |
| 87  | KR  | Services              | Retail Grocery                |
| 88  | SCH | Financial             | Investment Services           |
| 89  | OXY | Energy                | Oil & Gas Operations          |
| 90  | BNI | Transportation        | Railroad                      |
| 91  | K   | Consumer_Non_Cyclical | Food Processing               |
| 92  | CI  | Financial             | Insurance Accidental & Health |
| 93  | GDW | Financial             | S&Ls/Savings Banks            |
| 94  | HDI | Consumer_Cyclical     | Recreational Products         |
| 95  | DHR | Technology            | Scientific & Technical Instr. |
| 96  | KSS | Services              | Retail Department & Discount  |
| 97  | WLP | Financial             | Insurance Accidental & Health |
| 98  | CAG | Consumer_Non_Cyclical | Food Processing               |
| 99  | FON | Services              | Communication Services        |
| 100 | BSC | Financial             | Investment Services           |
| 101 | AT  | Services              | Communication Services        |
| 102 | CPB | Consumer_Non_Cyclical | Food Processing               |
| 103 | GLW | Technology            | Communication Equipment       |
| 104 | WPO | Services              | Printing & Publishing         |
| 105 | KEY | Financial             | Regional Banks                |

|     |     |                       |                               |
|-----|-----|-----------------------|-------------------------------|
| 106 | MHP | Services              | Printing & Publishing         |
| 107 | ETR | Utilities             | Electric Utilities            |
| 108 | WY  | Basic_Materials       | Forestry & Wood Products      |
| 109 | COF | Financial             | Regional Banks                |
| 110 | BDX | Healthcare            | Medical Equipment & Supplies  |
| 111 | PX  | Basic_Materials       | Chemical Manufacturing        |
| 112 | APA | Energy                | Oil & Gas Operations          |
| 113 | CB  | Financial             | Insurance Prop. & Casualty    |
| 114 | BR  | Energy                | Oil & Gas Operations          |
| 115 | APD | Basic_Materials       | Chemical Manufacturing        |
| 116 | PBI | Technology            | Office Equipment              |
| 117 | APC | Energy                | Oil & Gas Operations          |
| 118 | HNZ | Consumer_Non_Cyclical | Food Processing               |
| 119 | MAS | Consumer_Cyclical     | Furniture & Fixtures          |
| 120 | BEN | Financial             | Investment Services           |
| 121 | LUV | Transportation        | Airline                       |
| 122 | SWY | Services              | Retail Grocery                |
| 123 | FD  | Services              | Retail Department & Discount  |
| 124 | AEP | Utilities             | Electric Utilities            |
| 125 | CLX | Consumer_Non_Cyclical | Personal & Household Products |
| 126 | HRB | Services              | Personal Services             |
| 127 | FPL | Utilities             | Electric Utilities            |
| 128 | HAL | Energy                | Oil Well Services & Equipment |
| 129 | MAR | Services              | Hotels & Motels               |
| 130 | HSY | Consumer_Non_Cyclical | Food Processing               |
| 131 | NKE | Consumer_Cyclical     | Footwear                      |
| 132 | TXT | Conglomerates         | Conglomerates                 |
| 133 | TJX | Services              | Retail Apparel                |
| 134 | XRX | Technology            | Office Equipment              |
| 135 | BHI | Energy                | Oil Well Services & Equipment |
| 136 | WWY | Consumer_Non_Cyclical | Food Processing               |
| 137 | TMX | Services              | Communication Services        |
| 138 | JCI | Consumer_Cyclical     | Auto & Truck Parts            |
| 139 | ROH | Basic_Materials       | Chemical - Plastic & Rubber   |
| 140 | AGN | Healthcare            | Biotechnology & Drugs         |
| 141 | ASO | Financial             | Regional Banks                |
| 142 | ADM | Consumer_Non_Cyclical | Food Processing               |
| 143 | CCE | Consumer_Non_Cyclical | Beverages Non-Alcoholic       |
| 144 | EK  | Consumer_Cyclical     | Photography                   |
| 145 | CMA | Financial             | Regional Banks                |
| 146 | PEG | Utilities             | Electric Utilities            |
| 147 | UCL | Energy                | Oil & Gas Operations          |
| 148 | NSC | Transportation        | Railroad                      |
| 149 | MCK | Consumer_Non_Cyclical | Personal & Household Products |
| 150 | DOV | Conglomerates         | Conglomerates                 |
| 151 | LTD | Services              | Retail Apparel                |
| 152 | LTR | Financial             | Insurance Prop. & Casualty    |
| 153 | ETN | Capital_Good          | Misc. Capital Goods           |
| 154 | MBI | Financial             | Insurance Prop. & Casualty    |
| 155 | SPC | Technology            | Technology                    |
| 156 | SNV | Financial             | Regional Banks                |
| 157 | SPG | Services              | Real Estate Operations        |
| 158 | AZO | Services              | Retail Specialty              |

|     |     |                       |                                    |
|-----|-----|-----------------------|------------------------------------|
| 159 | MAT | Consumer_Cyclical     | Recreational Products              |
| 160 | ECL | Consumer_Non_Cyclical | Personal & Household Products      |
| 161 | ABS | Services              | Retail Grocery                     |
| 162 | CSC | Technology            | Computer Services                  |
| 163 | YPF | Energy                | Oil & Gas Operations               |
| 164 | MU  | Technology            | Semiconductors                     |
| 165 | EQR | Services              | Real Estate Operations             |
| 166 | PD  | Basic_Materials       | Metal Mining                       |
| 167 | AOC | Financial             | Insurance Miscellaneous            |
| 168 | CSX | Transportation        | Railroad                           |
| 169 | GP  | Basic_Materials       | Paper & Paper Products             |
| 170 | ROK | Technology            | Electronics Instruments & Controls |
| 171 | MYL | Healthcare            | Biotechnology & Drugs              |
| 172 | ABK | Financial             | Insurance Prop. & Casualty         |
| 173 | UST | Consumer_Non_Cyclical | Tobacco                            |
| 174 | SHW | Services              | Retail Home Improvement            |
| 175 | LNC | Financial             | Insurance Life                     |
| 176 | JCP | Services              | Retail Department & Discount       |
| 177 | JP  | Financial             | Insurance Life                     |
| 178 | NSM | Technology            | Semiconductors                     |
| 179 | NFB | Financial             | Regional Banks                     |
| 180 | PH  | Basic_Materials       | Misc. Fabricated Products          |
| 181 | AVY | Basic_Materials       | Container & Packaging              |
| 182 | MTG | Financial             | Insurance Prop. & Casualty         |
| 183 | ABX | Basic_Materials       | Gold & Silver                      |
| 184 | UN  | Consumer_Non_Cyclical | Food Processing                    |
| 185 | CIN | Utilities             | Electric Utilities                 |
| 186 | CTX | Capital_Good          | Construction Services              |
| 187 | RCL | Services              | Recreational Activities            |
| 188 | TOT | Energy                | Oil & Gas - Integrated             |
| 189 | FDO | Services              | Retail Specialty                   |
| 190 | ODP | Services              | Retail Specialty                   |
| 191 | HLT | Services              | Hotels & Motels                    |
| 192 | VMC | Capital_Good          | Construction - Raw Materials       |
| 193 | TIF | Services              | Retail Specialty                   |
| 194 | NWL | Consumer_Non_Cyclical | Personal & Household Products      |
| 195 | WHR | Consumer_Cyclical     | Appliance & Tool                   |
| 196 | HMA | Healthcare            | Healthcare Facilities              |
| 197 | MGG | Services              | Casinos & Gaming                   |
| 198 | LIZ | Consumer_Cyclical     | Apparel/Accessories                |
| 199 | SSP | Services              | Printing & Publishing              |
| 200 | BJS | Energy                | Oil Well Services & Equipment      |
| 201 | KRI | Services              | Printing & Publishing              |
| 202 | VNO | Services              | Real Estate Operations             |
| 203 | MUR | Energy                | Oil & Gas Operations               |
| 204 | TSS | Technology            | Computer Services                  |
| 205 | IPG | Services              | Advertising                        |
| 206 | VFC | Consumer_Cyclical     | Apparel/Accessories                |
| 207 | UPC | Financial             | Regional Banks                     |
| 208 | GGP | Services              | Real Estate Operations             |
| 209 | HAR | Consumer_Cyclical     | Audio & Video Equipment            |
| 210 | GPC | Consumer_Cyclical     | Auto & Truck Parts                 |
| 211 | PHM | Capital_Good          | Construction Services              |

|     |     |                   |                                    |
|-----|-----|-------------------|------------------------------------|
| 212 | PCL | Basic_Materials   | Forestry & Wood Products           |
| 213 | VLO | Energy            | Oil & Gas Operations               |
| 214 | TER | Technology        | Semiconductors                     |
| 215 | TMK | Financial         | Insurance Accidental & Health      |
| 216 | LUK | Conglomerates     | Conglomerates                      |
| 217 | CNA | Financial         | Insurance Prop. & Casualty         |
| 218 | FNF | Financial         | Insurance Prop. & Casualty         |
| 219 | WMB | Utilities         | Natural Gas Utilities              |
| 220 | AMD | Technology        | Semiconductors                     |
| 221 | JNY | Consumer_Cyclical | Apparel/Accessories                |
| 222 | GWW | Capital_Good      | Misc. Capital Goods                |
| 223 | LM  | Financial         | Investment Services                |
| 224 | NUE | Basic_Materials   | Iron & Steel                       |
| 225 | HB  | Technology        | Scientific & Technical Instr.      |
| 226 | UIS | Technology        | Computer Services                  |
| 227 | KIM | Services          | Real Estate Operations             |
| 228 | SLR | Technology        | Electronics Instruments & Controls |
| 229 | AHC | Energy            | Oil & Gas - Integrated             |
| 230 | CDN | Technology        | Software & Programming             |
| 231 | TCB | Financial         | Regional Banks                     |
| 232 | BCR | Healthcare        | Medical Equipment & Supplies       |
| 233 | KMG | Energy            | Oil & Gas Operations               |
| 234 | CTL | Services          | Communication Services             |
| 235 | UNM | Financial         | Insurance Accidental & Health      |
| 236 | VAR | Healthcare        | Medical Equipment & Supplies       |
| 237 | ORI | Financial         | Insurance Prop. & Casualty         |
| 238 | RHI | Services          | Services                           |
| 239 | BLL | Basic_Materials   | Container & Packaging              |
| 240 | SEE | Basic_Materials   | Container & Packaging              |
| 241 | GTK | Technology        | Computer Services                  |
| 242 | WEN | Services          | Restaurants                        |
| 243 | SFA | Technology        | Communication Equipment            |
| 244 | EFX | Services          | Business Services                  |
| 245 | EC  | Basic_Materials   | Chemical Manufacturing             |
| 246 | LEA | Consumer_Cyclical | Auto & Truck Parts                 |
| 247 | MME | Healthcare        | Healthcare                         |
| 248 | TMO | Technology        | Scientific & Technical Instr.      |
| 249 | SBL | Technology        | Computer Peripherals               |
| 250 | SVU | Services          | Retail Grocery                     |
| 251 | TRH | Financial         | Insurance Accidental & Health      |
| 252 | GR  | Capital_Good      | Aerospace & Defense                |
| 253 | LEG | Consumer_Cyclical | Furniture & Fixtures               |
| 254 | SII | Energy            | Oil Well Services & Equipment      |
| 255 | DNY | Services          | Services                           |
| 256 | DRE | Services          | Real Estate Operations             |
| 257 | OCR | Services          | Retail Drugs                       |
| 258 | MAN | Services          | Services                           |
| 259 | SNE | Consumer_Cyclical | Audio & Video Equipment            |
| 260 | DJ  | Services          | Printing & Publishing              |
| 261 | IFF | Basic_Materials   | Chemical Manufacturing             |
| 262 | N   | Basic_Materials   | Metal Mining                       |
| 263 | DBD | Technology        | Office Equipment                   |
| 264 | HUM | Financial         | Insurance Accidental & Health      |

|     |     |                       |                                    |
|-----|-----|-----------------------|------------------------------------|
| 265 | HIB | Financial             | Regional Banks                     |
| 266 | RBK | Consumer_Cyclical     | Footwear                           |
| 267 | HMT | Services              | Real Estate Operations             |
| 268 | WEC | Utilities             | Electric Utilities                 |
| 269 | EAT | Services              | Restaurants                        |
| 270 | TIN | Conglomerates         | Conglomerates                      |
| 271 | BDK | Consumer_Cyclical     | Appliance & Tool                   |
| 272 | TOY | Services              | Retail Specialty                   |
| 273 | NWS | Services              | Printing & Publishing              |
| 274 | BFB | Consumer_Non_Cyclical | Beverages Alcoholic                |
| 275 | SVM | Services              | Services                           |
| 276 | PNW | Utilities             | Electric Utilities                 |
| 277 | NAV | Consumer_Cyclical     | Auto & Truck Manufacturers         |
| 278 | TV  | Services              | Broadcasting & Cable TV            |
| 279 | HRL | Consumer_Non_Cyclical | Food Processing                    |
| 280 | TEF | Services              | Communication Services             |
| 281 | SWK | Consumer_Cyclical     | Appliance & Tool                   |
| 282 | AGE | Financial             | Investment Services                |
| 283 | PLL | Technology            | Scientific & Technical Instr.      |
| 284 | APH | Technology            | Electronics Instruments & Controls |
| 285 | DPL | Utilities             | Electric Utilities                 |
| 286 | PVN | Financial             | Regional Banks                     |
| 287 | MDP | Services              | Printing & Publishing              |
| 288 | EMN | Basic_Materials       | Chemical - Plastic & Rubber        |
| 289 | LSI | Technology            | Semiconductors                     |
| 290 | BCE | Services              | Communication Services             |
| 291 | AIV | Services              | Real Estate Operations             |
| 292 | VSH | Technology            | Electronics Instruments & Controls |
| 293 | BEC | Technology            | Scientific & Technical Instr.      |
| 294 | BC  | Consumer_Cyclical     | Recreational Products              |
| 295 | MYG | Consumer_Cyclical     | Appliance & Tool                   |
| 296 | HCP | Services              | Real Estate Operations             |
| 297 | EQT | Utilities             | Natural Gas Utilities              |
| 298 | IRF | Technology            | Semiconductors                     |
| 299 | CYN | Financial             | Regional Banks                     |
| 300 | AL  | Basic_Materials       | Metal Mining                       |

| <b>company_name</b>           |
|-------------------------------|
| General Electric              |
| PFIZER INC                    |
| WAL-MART STORES INC           |
| AMERICAN INTL GROUP INC       |
| INTL BUSINESS MACHINES CORP   |
| COCA-COLA CO                  |
| JOHNSON AND JOHNSON           |
| PROCTER GAMBLE CO             |
| MERCK CO INC                  |
| BANK OF AMERICA CORP          |
| WELLS FARGO CO NEW            |
| SBC COMMUNICATIONS INC        |
| FANNIE MAE                    |
| HOME DEPOT INC                |
| PEPSICO INC                   |
| LILLY ELI CO                  |
| ANHEUSER BUSCH COS INC        |
| ABBOTT LABORATORIES           |
| BRISTOL MYERS SQUIBB COMPANY  |
| AMERICAN EXPRESS COMPANY      |
| MERRILL LYNCH CO INC          |
| MEDTRONIC INC                 |
| UNITED TECHNOLOGIES CORP      |
| BELLSOUTH CORPORATION         |
| BANK ONE CORP                 |
| TYCO INTERNATIONAL LTD NEW    |
| TEXAS INSTRUMENTS             |
| GILLETTE CO                   |
| DU PONT DE NEMOURS E I CO     |
| WALT DISNEY CO-DISNEY COMMON  |
| LOWES COMPANIES INC           |
| BOEING CO                     |
| FREDDIE MAC D/B/A VOTING      |
| MCDONALDS CORP                |
| DOW CHEMICAL CO               |
| GENERAL MOTORS CORP           |
| ALLSTATE CORP THE             |
| WALGREEN COMPANY              |
| FIRST DATA CORP               |
| COLGATE-PALMOLIVE CO          |
| SCHLUMBERGER LTD              |
| SCHERING PLOUGH CORP          |
| BANK OF NEW YORK INC          |
| CATERPILLAR INC               |
| KIMBERLY CLARK CORP           |
| MOTOROLA INC                  |
| M B N A CORP                  |
| EMERSON ELECTRIC CO           |
| BOSTON SCIENTIFIC CORP        |
| EMC CORPORATION               |
| GANNETT CO INC                |
| CLEAR CHANNEL COMMUNICTNS INC |

|                                |
|--------------------------------|
| CARDINAL HEALTH INC            |
| SYSCO CORP                     |
| TRIBUNE COMPANY                |
| MARSH MCLENNAN COS INC         |
| ROYAL DUTCH PET NEW 1.25GLDRS  |
| ILLINOIS TOOL WORKS            |
| INTL GAME TECHNOLOGY           |
| AVON PRODUCTS INC              |
| AFLAC INC                      |
| GENERAL MILLS INC              |
| GAP INC THE                    |
| NATIONAL CITY CORP             |
| SOUTHERN CO                    |
| GENERAL DYNAMICS CORP          |
| SUNTRUST BANKS INC             |
| INTERNATIONAL PAPER CO         |
| LEHMAN BROTHERS HOLDINGS       |
| BAXTER INTERNATIONAL INC       |
| SEARS ROEBUCK CO               |
| PNC FINL SVCS GRP INC THE      |
| PROGRESSIVE CORP               |
| UNION PACIFIC CORPORATION      |
| MELLON FINANCIAL CORP          |
| GUIDANT CORP                   |
| PPG INDUSTRIES INC             |
| DUKE ENERGY CORPORATION        |
| NEWMONT MINING CORP HOLDING C  |
| NORTHROP GRUMMAN CP HLDG CO    |
| DEERE CO                       |
| OMNICOM GROUP INC              |
| COMPUTER ASSOCIATES INTL INC   |
| SARA LEE CORP                  |
| ANALOG DEVICES INC             |
| BEST BUY CO INC                |
| KROGER CO                      |
| SCHWAB CHARLES CORP            |
| OCCIDENTAL PETROLEUM CORP      |
| BURLINGTON NRTHRN SANTA FE COM |
| KELLOGG CO                     |
| CIGNA CORP                     |
| GOLDEN WEST FINANCIAL CORP     |
| HARLEY DAVIDSON INC            |
| DANAHER CORP                   |
| KOHL'S CORP                    |
| WELLPOINT HLTH NETWKS HLDG CO  |
| CONAGRA FOODS INC.             |
| SPRINT CORP FON GROUP          |
| BEAR STEARNS COMPANIES INC     |
| ALLTEL CORP                    |
| CAMPBELL SOUP CO CAPITAL       |
| CORNING INCORPORATED           |
| WASHINGTON POST CO CLB         |
| KEYCORP NEW                    |



|                               |
|-------------------------------|
| MCGRAW-HILL COS INC THE       |
| ENTERGY CORP NEW              |
| WEYERHAEUSER COMPANY          |
| CAPITAL ONE FINANCIAL CORP    |
| BECTON DICKINSON CO           |
| PRAXAIR INC                   |
| APACHE CORP                   |
| CHUBB CORPORATION             |
| BURLINGTON RESOURCES INC      |
| AIR PROD CHEM INC             |
| PITNEY-BOWES INC              |
| ANADARKO PETROLEUM CORP       |
| HEINZ H.J. CO                 |
| MASCO CORP                    |
| FRANKLIN RESOURCES            |
| SOUTHWEST AIRLINES CO         |
| SAFEWAY INC                   |
| FEDERATED DEPRTMNT STORES NEW |
| AMERICAN ELECTRIC POWER INC   |
| CLOROX CO                     |
| BLOCK H R INC                 |
| FPL GROUP INC                 |
| HALLIBURTON CO HOLDING CO     |
| MARRIOTT INT L INC NEW CL A   |
| HERSHEY FOODS CORP            |
| NIKE INC CL-B                 |
| TEXTRON INCORPORATED OF DEL   |
| TJX COMPANIES INC             |
| XEROX CORPORATION             |
| BAKER HUGHES INC              |
| WRIGLEY WILLIAM JR            |
| TELEFONOS DE MEX ADR REP 20-L |
| JOHNSON CONTROLS INC          |
| ROHM AND HASS COMPANY         |
| ALLERGAN INC                  |
| AMSOUTH BANCORPORATION        |
| ARCHER DANIELS MIDLAND CO     |
| COCA-COLA ENTERPRISES INC.    |
| EASTMAN KODAK CO              |
| COMERICA INC                  |
| PUB SVC ENTERPRISE GROUP INC  |
| UNOCAL CORP DEL               |
| NORFOLK SOUTHERN CORP         |
| MCKESSON CORPORATION          |
| DOVER CORP                    |
| LIMITED BRANDS INC.           |
| LOEWS CORP                    |
| EATON CORP                    |
| MBIA INC                      |
| ST PAUL CO S INC THE          |
| SYNOVUS FINANCIAL CORP        |
| SIMON PROPERTIES GROUP INC    |
| AUTOZONE INC                  |

|                               |
|-------------------------------|
| MATTEL INC                    |
| ECOLAB INC                    |
| ALBERTSON S INC               |
| COMPUTER SCIENCES CORP        |
| YPF SOCIEDAD ANONIMA ADS      |
| MICRON TECHNOLOGY INC         |
| EQUITY RESIDENTIAL            |
| PHELPS DODGE CORP             |
| AON CORPORATION               |
| CSX CORP                      |
| GEORGIA PACIFIC CORP          |
| ROCKWELL AUTOMATION INC.      |
| MYLAN LABORATORIES INC        |
| AMBAC FINANCIAL GROUP INC.    |
| UST INC                       |
| SHERWIN-WILLIAMS CO           |
| LINCOLN NATIONAL CORP         |
| PENNEY J.C. CO INC HOLDING CO |
| JEFFERSON-PILOT CORP          |
| NATIONAL SEMICONDUCTOR CORP   |
| NORTH FORK BANCORPORATION INC |
| PARKER-HANNIFIN CORP          |
| AVERY DENNISON CORP           |
| MGIC INVESTMENT CORP          |
| BARRICK GOLD CORP             |
| UNILEVER NV NEW NY SHARES     |
| CINERGY CORP                  |
| CENTEX CORP                   |
| ROYAL CARIBBEAN CRUISES LTD   |
| TOTAL S.A. ADS REPTG 1/2 OF A |
| FAMILY DOLLAR STORES          |
| OFFICE DEPOT INC              |
| HILTON HOTELS CORP            |
| VULCAN MATERIALS COMPANY      |
| TIFFANY CO                    |
| NEWELL RUBBERMAID INC         |
| WHIRLPOOL CORPORATION         |
| HEALTH MGMT ASSOC INC CL-A    |
| MGM MIRAGE                    |
| LIZ CLAIBORNE INC             |
| SCRIPPS CO E.W. CL-A NEW      |
| BJ SERVICES CO                |
| KNIGHT-RIDDER INC             |
| VORNADO REALTY TRUST          |
| MURPHY OIL CORPORATION        |
| TOTAL SYSTEM SERVICES INC     |
| INTERPUBLIC GROUP COS INC     |
| V. F. CORPORATION             |
| UNION PLANTERS CORP           |
| GENERAL GROWTH PROPERTIES INC |
| HARMAN INT L IND INC          |
| GENUINE PARTS CO              |
| PULTE HOMES INC               |

|                               |
|-------------------------------|
| PLUM CREEK TIMBER CO REIT     |
| VALERO ENERGY CORP NEW        |
| TERADYNE INC                  |
| TORCHMARK CORP                |
| LEUCADIA NATIONAL CORP        |
| CNA FINANCIAL CORP            |
| FIDELITY NATL FINANCIAL INC   |
| WILLIAMS COMPANIES            |
| ADVANCED MICRO DEVICES        |
| JONES APPAREL GROUP INC       |
| GRAINGER W.W.INC              |
| LEGG MASON INC                |
| NUCOR CORP                    |
| HILLEBRAND INDUSTRIES INC     |
| UNISYS CORP                   |
| KIMCO REALTY CORPORATION      |
| SOLECTRON CORP                |
| AMERADA HESS CORP             |
| CADENCE DESIGN SYS INC        |
| TCF FINANCIAL CORP            |
| BARD C R INC                  |
| KERR-MCGEE CORP HOLDING COMPA |
| CENTURYTEL INC                |
| UNUMPROVIDENT CRP             |
| VARIAN MEDICAL SYSTEMS INC    |
| OLD REPUBLIC INTL CORP        |
| ROBERT HALF INTERNATIONAL INC |
| BALL CORP                     |
| SEALED AIR CORP NEW           |
| GTECH HOLDINGS CORP           |
| WENDYS INTERNATIONAL          |
| SCIENTIFIC ATLANTA INC        |
| EQUIFAX INCORPORATED          |
| ENGELHARD CORP                |
| LEAR CORP                     |
| MID ATLANTIC MEDICAL SVCS INC |
| THERMO ELECTRON CORP          |
| SYMBOL TECHNOLOGIES INC       |
| SUPERVALU INC                 |
| TRANSATLANTIC HOLDINGS INC    |
| GOODRICH CORP                 |
| LEGGETT PLATT INC             |
| SMITH INTERNATIONAL INC       |
| DONNELLEY R R SONS CO         |
| DUKE REALTY CORP              |
| OMNICARE INC                  |
| MANPOWER INC                  |
| SONY CORP ADR                 |
| DOW JONES COMPANY INC         |
| INTL FLAVORS FRAGRANCES       |
| INCO LIMITED                  |
| DIEBOLD INC                   |
| HUMANA INC                    |

|                                 |
|---------------------------------|
| HIBERNIA CORP CL A VOTING       |
| REEBOK INTERNATIONAL LTD        |
| HOST MARRIOTT CORP REIT         |
| WISCONSIN ENERGY CORP           |
| BRINKER INTL INC                |
| TEMPLE INLAND INC               |
| BLACK DECKER CORP               |
| TOYS R US INC HLDG CO           |
| NEWS CORP LTD ADS               |
| BROWN-FORMAN CORP CL-B          |
| SERVICEMASTER CO THE            |
| PINNACLE WEST CAP CORP          |
| NAVISTAR INTL CORP HLDG CO      |
| GRUPO TELEVISIA SA GDS RP20 ORD |
| HORMEL FOODS CORPORATION        |
| TELEFONICA S.A.ADS RP 3 SHS     |
| STANLEY WORKS                   |
| A.G.EDWARDS INC                 |
| PALL CORP                       |
| AMPHENOL CORP NEW CL-A          |
| DPL INC HOLDING CO              |
| PROVIDIAN FINANCIAL BANCORP     |
| MEREDITH CORP                   |
| EASTMAN CHEMICAL CO             |
| LSI LOGIC CORPORATION           |
| BCE INC                         |
| APARTMENT INVST MGMT CO         |
| VISHAY INTERTECHNOLOGY INC      |
| BECKMAN COULTER INC.            |
| BRUNSWICK CORP                  |
| MAYTAG CORPORATION              |
| HEALTH CARE PROPERTY INVS INC   |
| EQUITABLE RESOURCES INC         |
| INTL RECTIFIER CORP             |
| CITY NATIONAL CORPORATION       |
| ALCAN INC                       |
