# Supplementary material for: Dominating Clasp of the Financial Sector Revealed by Partial Correlation Analysis of the Stock Market
Source: PubMed Central journal article supplement (PMC3004792; doi:10.1371/journal.pone.0015032), 2010-12-20
Supplement: pone.0015032.s002.pdf [file pone.0015032.s002.pdf]

| <b>index</b> | <b>subsector</b>                   | <b>sector</b>         | <b>#_stocks</b> |
|--------------|------------------------------------|-----------------------|-----------------|
| 1            | Advertising                        | Services              | 2               |
| 2            | Aerospace & Defense                | Capital_Good          | 4               |
| 3            | Airline                            | Transportation        | 1               |
| 4            | Apparel/Accessories                | Consumer_Cyclical     | 3               |
| 5            | Appliance & Tool                   | Consumer_Cyclical     | 4               |
| 6            | Audio & Video Equipment            | Consumer_Cyclical     | 2               |
| 7            | Auto & Truck Manufacturers         | Consumer_Cyclical     | 2               |
| 8            | Auto & Truck Parts                 | Consumer_Cyclical     | 3               |
| 9            | Beverages Alcoholic                | Consumer_Non_Cyclical | 2               |
| 10           | Beverages Non-Alcoholic            | Consumer_Non_Cyclical | 3               |
| 11           | Biotechnology & Drugs              | Healthcare            | 3               |
| 12           | Broadcasting & Cable TV            | Services              | 3               |
| 13           | Business Services                  | Services              | 1               |
| 14           | Casinos & Gaming                   | Services              | 2               |
| 15           | Chemical Manufacturing             | Basic_Materials       | 5               |
| 16           | Chemical - Plastic & Rubber        | Basic_Materials       | 4               |
| 17           | Communication Equipment            | Technology            | 3               |
| 18           | Communication Services             | Services              | 8               |
| 19           | Computer Hardware                  | Technology            | 1               |
| 20           | Computer Peripherals               | Technology            | 1               |
| 21           | Computer Services                  | Technology            | 5               |
| 22           | Computer Storage Devices           | Technology            | 1               |
| 23           | Conglomerates                      | Conglomerates         | 8               |
| 24           | Constr. & Agric. Machinery         | Capital_Good          | 2               |
| 25           | Construction - Raw Materials       | Capital_Good          | 1               |
| 26           | Construction Services              | Capital_Good          | 2               |
| 27           | Consumer Financial Services        | Financial             | 3               |
| 28           | Container & Packaging              | Basic_Materials       | 3               |
| 29           | Electric Utilities                 | Utilities             | 10              |
| 30           | Electronics Instruments & Controls | Technology            | 4               |
| 31           | Food Processing                    | Consumer_Non_Cyclical | 11              |
| 32           | Footwear                           | Consumer_Cyclical     | 2               |
| 33           | Forestry & Wood Products           | Basic_Materials       | 2               |
| 34           | Furniture & Fixtures               | Consumer_Cyclical     | 2               |
| 35           | Gold & Silver                      | Basic_Materials       | 2               |
| 36           | Healthcare                         | Healthcare            | 1               |
| 37           | Healthcare Facilities              | Healthcare            | 1               |
| 38           | Hotels & Motels                    | Services              | 2               |
| 39           | Insurance Accidental & Health      | Financial             | 7               |
| 40           | Insurance Life                     | Financial             | 2               |
| 41           | Insurance Miscellaneous            | Financial             | 2               |
| 42           | Insurance Prop. & Casualty         | Financial             | 11              |
| 43           | Investment Services                | Financial             | 8               |
| 44           | Iron & Steel                       | Basic_Materials       | 1               |
| 45           | Major Drugs                        | Healthcare            | 7               |
| 46           | Medical Equipment & Supplies       | Healthcare            | 7               |
| 47           | Metal Mining                       | Basic_Materials       | 3               |
| 48           | Misc. Capital Goods                | Capital_Good          | 3               |
| 49           | Misc. Fabricated Products          | Basic_Materials       | 1               |
| 50           | Money Center Banks                 | Financial             | 3               |
| 51           | Natural Gas Utilities              | Utilities             | 2               |
| 52           | Office Equipment                   | Technology            | 3               |

|    |                               |                       |    |
|----|-------------------------------|-----------------------|----|
| 53 | Oil & Gas - Integrated        | Energy                | 3  |
| 54 | Oil & Gas Operations          | Energy                | 9  |
| 55 | Oil Well Services & Equipment | Energy                | 5  |
| 56 | Paper & Paper Products        | Basic_Materials       | 3  |
| 57 | Personal & Household Products | Consumer_Non_Cyclical | 8  |
| 58 | Personal Services             | Services              | 1  |
| 59 | Photography                   | Consumer_Cyclical     | 1  |
| 60 | Printing & Publishing         | Services              | 9  |
| 61 | Railroad                      | Transportation        | 4  |
| 62 | Real Estate Operations        | Services              | 9  |
| 63 | Recreational Activities       | Services              | 1  |
| 64 | Recreational Products         | Consumer_Cyclical     | 3  |
| 65 | Regional Banks                | Financial             | 16 |
| 66 | Restaurants                   | Services              | 3  |
| 67 | Retail Apparel                | Services              | 3  |
| 68 | Retail Department & Discount  | Services              | 4  |
| 69 | Retail Drugs                  | Services              | 2  |
| 70 | Retail Grocery                | Services              | 5  |
| 71 | Retail Home Improvement       | Services              | 3  |
| 72 | Retail Specialty              | Services              | 5  |
| 73 | Retail Technology             | Services              | 1  |
| 74 | Scientific & Technical Instr. | Technology            | 5  |
| 75 | Semiconductors                | Technology            | 8  |
| 76 | Services                      | Services              | 5  |
| 77 | S&Ls/Savings Banks            | Financial             | 1  |
| 78 | Software & Programming        | Technology            | 2  |
| 79 | Technology                    | Technology            | 1  |
| 80 | Tobacco                       | Consumer_Non_Cyclical | 1  |
